# Supplementary material for: A HOTAIR regulatory element modulates glioma cell sensitivity to temozolomide through long-range regulation of multiple target genes
Source: HighWire-hosted journal article supplement (doi:10.1101/gr.251058.119), 2020-01-17
Supplement: Supplemental_Fig_S1.pdf [file Supplemental_Fig_S1.pdf]

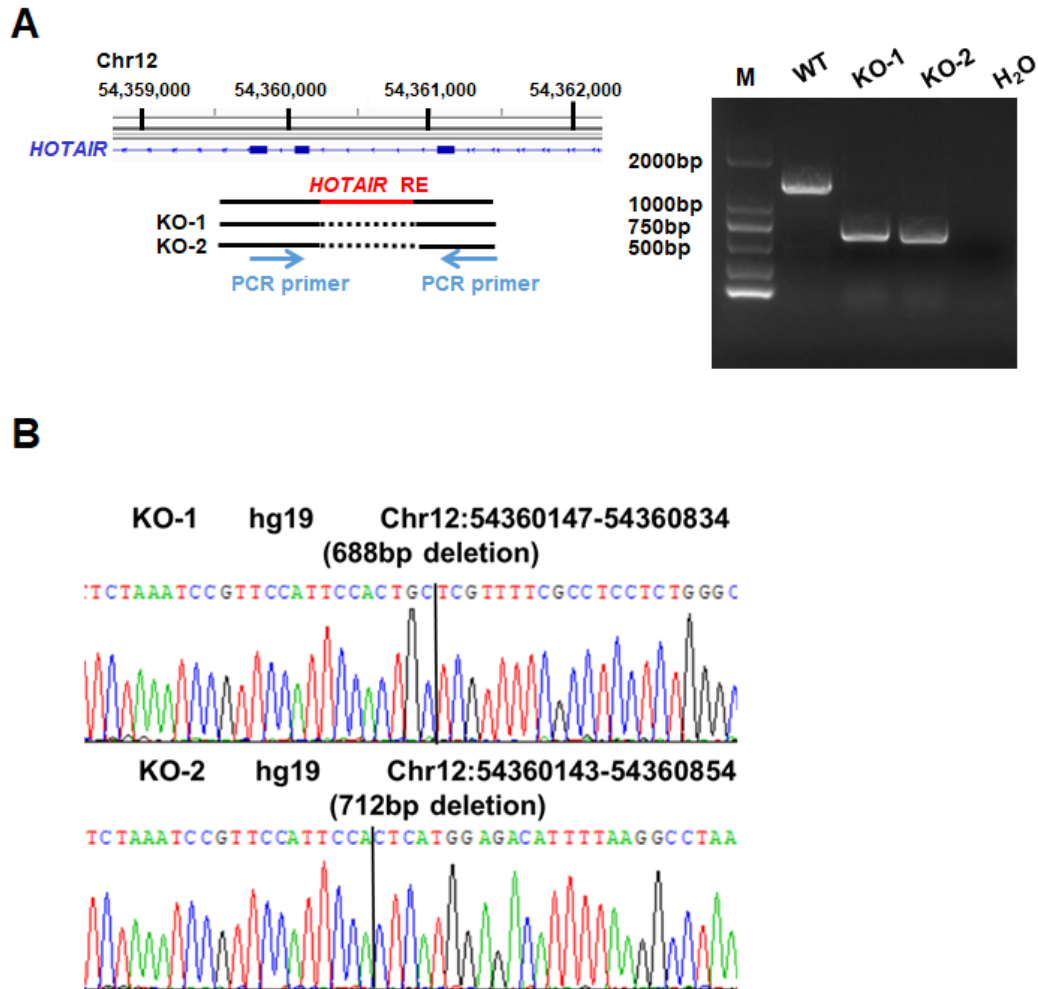

**Figure S1. CRISPR-Cas9 mediated deletion of the *HOTAIR* regulatory element.** (A) The *HOTAIR* regulatory element (core region: hg19\_Ch12:54360188-54360822) was deleted in KO-1 (deleted region: hg19\_Ch12:54360147-54360834) and KO-2 (deleted region: hg19\_Ch12:54360143-54360854) cell lines, PCR analysis used to identify the *HOTAIR* RE KO cell lines. PCR product of the regulatory element region was shown in the WT lane. M: marker; H<sub>2</sub>O: negative control, water as the PCR template. (B) Sequencing of the *HOTAIR* RE region in the KO cells.
