# Supplementary material for: A HOTAIR regulatory element modulates glioma cell sensitivity to temozolomide through long-range regulation of multiple target genes
Source: HighWire-hosted journal article supplement (doi:10.1101/gr.251058.119), 2020-01-17
Supplement: Supplemental_Fig_S2.pdf [file Supplemental_Fig_S2.pdf]

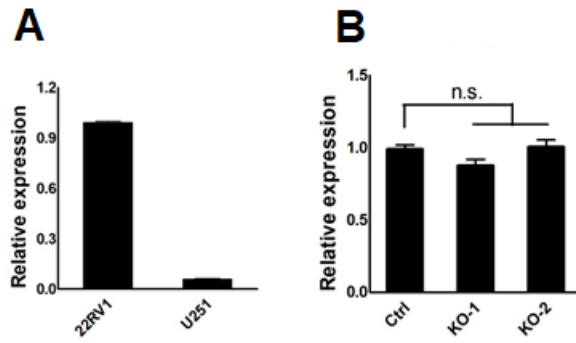

**Figure S2. *HOTAIR*'s expression in WT U251 cells and *HOTAIR* RE KO cells.** (A) RT-qPCR analysis of *HOTAIR* in U251 cells. Low level of *HOTAIR* in U251 cells compared with 22RV1 prostate cancer cells. Data represents means  $\pm$  S.E.M. of three independent experiments. (B) RT-qPCR analysis of *HOTAIR* in wild-type U251 cells and *HOTAIR* RE KO cells. Data represents means  $\pm$  S.E.M. of three independent experiments.
