# Supplementary material for: A HOTAIR regulatory element modulates glioma cell sensitivity to temozolomide through long-range regulation of multiple target genes
Source: HighWire-hosted journal article supplement (doi:10.1101/gr.251058.119), 2020-01-17
Supplement: Supplemental_Fig_S3.pdf [file Supplemental_Fig_S3.pdf]

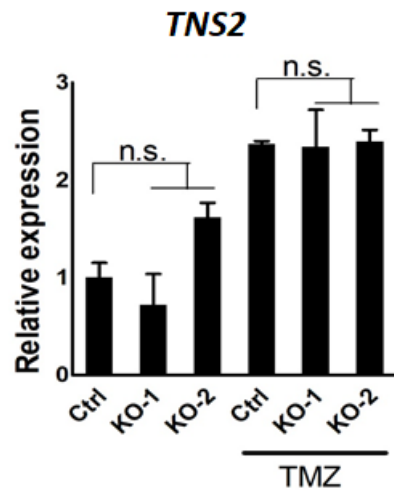

**Figure S3. *TNS1* mRNA levels in WT U251 cells and *HOTAIR* RE KO cells.** RT-qPCR analysis of *TNS2* in wild-type U251 cells and *HOTAIR* RE KO cells treated with or without TMZ (1mM, 72h). Data represents means  $\pm$  S.E.M. of three independent experiments.
