# Supplementary material for: A HOTAIR regulatory element modulates glioma cell sensitivity to temozolomide through long-range regulation of multiple target genes
Source: HighWire-hosted journal article supplement (doi:10.1101/gr.251058.119), 2020-01-17
Supplement: Supplemental_Fig_S4.pdf [file Supplemental_Fig_S4.pdf]

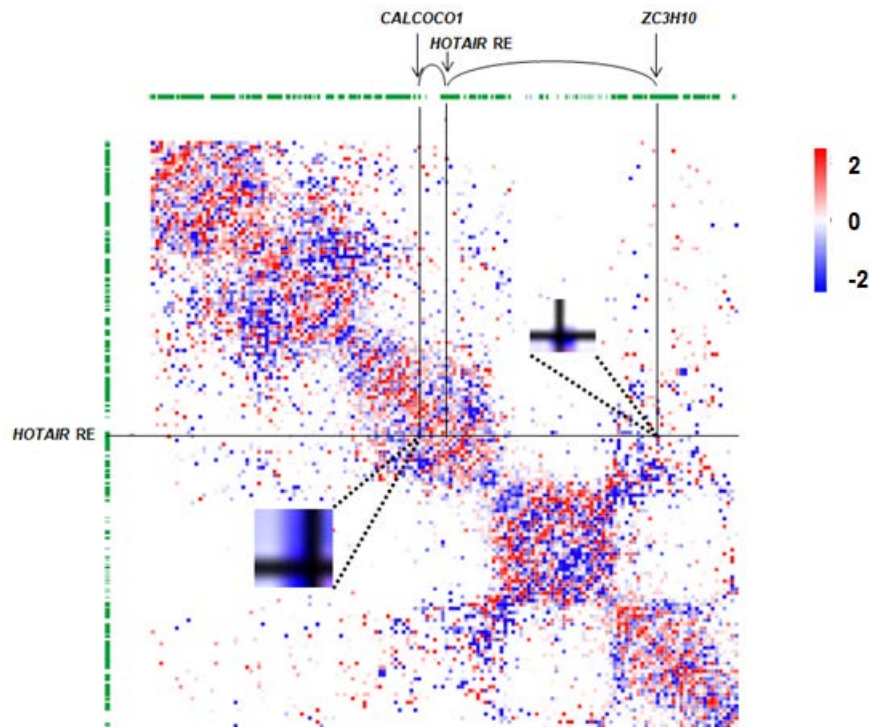

**Figure S4. Z-score difference maps of chromatin interactions between TMZ-treated U251 glioma cells.** Z-score difference maps binned at 40kb resolution for a chromatin region  $\pm 3\text{Mb}$  from the *HOTAIR* regulatory element show increased (red) and decreased (blue) frequency of chromatin interactions between TMZ-treated U251 glioma cells (TMZ 1mM, 72h) and control cells. Black lines show the location of *HOTAIR* regulatory element, *CALCOCO1* and *ZC3H10*, Blue dots at the cross point between *HOTAIR* regulatory element and *CALCOCO1* or *ZC3H10* indicates decrease of interactions between them. Enlarged views were near the cross point.
