# Supplementary material for: A HOTAIR regulatory element modulates glioma cell sensitivity to temozolomide through long-range regulation of multiple target genes
Source: HighWire-hosted journal article supplement (doi:10.1101/gr.251058.119), 2020-01-17
Supplement: Supplemental_Fig_S6.pdf [file Supplemental_Fig_S6.pdf]

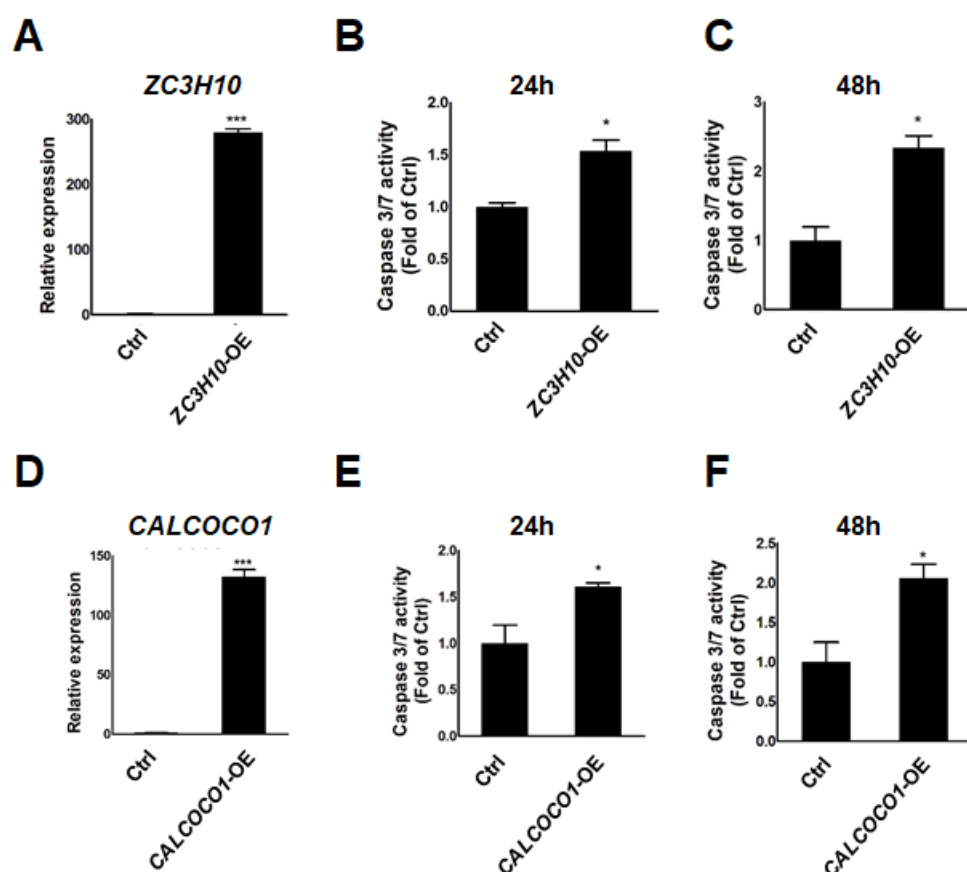

**Figure S6. Overexpression of *ZC3H10* or *CALCOCO1* induced increase of caspase-3/7 activities in U251 glioma cells.** (A) RT-qPCR analysis of *ZC3H10* in wild-type U251 cells transfected with control plasmid or *ZC3H10* overexpression plasmid. Data represents means  $\pm$  S.E.M. of three independent experiments. \*\*\* $p < 0.001$  compared with corresponding cells transfected with Ctrl vector. (B, C) Proteolytic activities of caspase-3/7 were tested in U251 cells that were transfected with control vector or *ZC3H10* over-expression plasmid (*ZC3H10*-OE). Caspase3/7 activities were tested after cells were treated 24h and 48h with TMZ (1mM). Data represents means  $\pm$  S.E.M. of three independent experiments. \* $p < 0.05$  compared with Ctrl. (D) RT-qPCR analysis of *CALCOCO1* in wild-type U251 cells transfected with control plasmid or *CALCOCO1* overexpression plasmid. Data represents means  $\pm$  S.E.M. of three independent experiments. \*\*\* $p < 0.001$  compared with corresponding cells transfected with Ctrl vector. (E, F) Proteolytic activities of caspase-3/7 were tested in U251 cells that were transfected with control vector or *CALCOCO1* over-expression plasmid (*CALCOCO1*-OE). Caspase3/7 activities were tested after cells were treated 24h and 48h with TMZ (1mM). Data represents means  $\pm$  S.E.M. of three independent experiments. \* $p < 0.05$  compared with Ctrl.
