# Supplementary material for: A HOTAIR regulatory element modulates glioma cell sensitivity to temozolomide through long-range regulation of multiple target genes
Source: HighWire-hosted journal article supplement (doi:10.1101/gr.251058.119), 2020-01-17
Supplement: Supplemental_Table_S1.docx [file Supplemental_Table_S1.docx]

**Table S1. Guide RNAs and genotyping PCR primers used for CRISPR-Cas9 mediated deletions.**

| gRNA | Sequence |
| --- | --- |
| hotair-enhde-L-1-F | CACCGCGCTTCGCAGTGGAATGGAA |
| hotair-enhde-L-1-R | AAACTTCCATTCCACTGCGAAGCGC |
| Genotyping PCR primers | Sequence |
| Genotype-F | CTTCCTTTACCGGGGGTGAG |
| Genotype-R | TGGGAGTTCCACAGACCAAC |
