# Supplementary material for: A HOTAIR regulatory element modulates glioma cell sensitivity to temozolomide through long-range regulation of multiple target genes
Source: HighWire-hosted journal article supplement (doi:10.1101/gr.251058.119), 2020-01-17
Supplement: Supplemental_Table_S2.docx [file Supplemental_Table_S2.docx]

**Table S2. Sequencing information of HiC libraries.**

|  | HiC-Ctrl | HiC-TMZ |
| --- | --- | --- |
| number of replicates | 2 | 2 |
| total reads pairs | 140159878 | 163208860 |
| unmapped_pairs | 2416290 | 6710835 |
| mapped reads pairs | 137743588 | 156498025 |
| pairs with_singleton | 14008718 | 26051153 |
| number of contact | 61084930 | 57770603 |
| reads pairs duplicates | 22190440 | 28491246 |
| number of valid interaction | 38894490 | 29279357 |
| inter-trans | 13436249 | 10170676 |
| intra-cis | 25458241 | 19108681 |
| trans interaction | 13436249 | 10170676 |
| cis interaction | 25458241 | 19108681 |
| cis short-range | 4453842 | 3669940 |
| cis long-range | 21004399 | 15438741 |
