# Supplementary material for: A HOTAIR regulatory element modulates glioma cell sensitivity to temozolomide through long-range regulation of multiple target genes
Source: HighWire-hosted journal article supplement (doi:10.1101/gr.251058.119), 2020-01-17
Supplement: Supplemental_Table_S3.docx [file Supplemental_Table_S3.docx]

**Table S3. Primers used in RT-qPCR experiment**

| Gene name | Primer | Sequence |
| --- | --- | --- |
| *HOTAIR* | Forward | GCAGTGGGGAACTCTGACTC |
| Reverse | TTGAGAGCACCTCCGGGATA |
| *ZC3H10* | Forward | ACCGGCTGACCTACCAAATG |
| Reverse | AAAATGAGGGCCATCAGGGG |
| *CALCOCO1* | Forward | AGTAGCTCTGACTCGGCTGAA |
| Reverse | CAGCAGGAAAGCGCTCCTTA |
| *RPL41* | Forward | AGCCAAGTGGAGGAAGAAGC |
| Reverse | CAGTAGCATGCAGTCCCACA |
