# Supplementary material for: A HOTAIR regulatory element modulates glioma cell sensitivity to temozolomide through long-range regulation of multiple target genes
Source: HighWire-hosted journal article supplement (doi:10.1101/gr.251058.119), 2020-01-17
Supplement: Supplemental_Table_S4.docx [file Supplemental_Table_S4.docx]

**Table S4. Primers used in 3C assay**

| 3C-*CALCOCO1*-1F | AATCCTGAGCAGAAGGCACT |
| --- | --- |
| 3C-*CALCOCO1*-1R | CTCGCATCTCCTCACATGGAA |
| 3C-*CALCOCO1*-2R | AGTGAAAGATGTGTGAGCTCCT |
| 3C-*CALCOCO1*-3R | AATTCATGGGGGTAGGCAGC |
| 3C-*CALCOCO1*-4R | TCACTCCACCCTTGAAGTTGC |
| 3C-*CALCOCO1*-5R | ACTACCCAGCACTCTTTCCTC |
| 3C-*CALCOCO1*-6R | TCCTGATGGGAGTGAAGTCCA |
| 3C-*CALCOCO1*-7R | GCTACAGGTCCCTCCCCATA |
| 3C-*CALCOCO1*-8R | TCAGTCCTCTGGCTAGTCCTC |
| 3C-*ZC3H10*-1F | AGGCATAGGCCACAACACTC |
| 3C-*ZC3H10*-1R | CTTGGACACCCTCCCAACAT |
| 3C-*ZC3H10*-2R | TCTCAACGTACCTGCGCATT |
| 3C-*ZC3H10*-3R | CTATCCAAGCCTGGCTCACG |
| 3C-*ZC3H10*-4R | ATCCCACTGACATCCAACCAC |
| 3C-*ZC3H10*-5R | AGGCAACCTGGGAATAGCAC |
| 3C-*ZC3H10*-6R | CCTGGCAAGGAGGAAATAAAGTC |
