# Supplementary material for: A HOTAIR regulatory element modulates glioma cell sensitivity to temozolomide through long-range regulation of multiple target genes
Source: HighWire-hosted journal article supplement (doi:10.1101/gr.251058.119), 2020-01-17
Supplement: Supplemental_Table_S5.docx [file Supplemental_Table_S5.docx]

**Table S5. siRNAs used to knock down *ZC3H10* and *CALCOCO1***

| Gene name | siRNA | Target Sequence |
| --- | --- | --- |
| *ZC3H10* | si-*ZC3H10*-1 | GTCATGATCTCTATGATAT |
| si-*ZC3H10*-2 | CGCCCAAATTGCCGTTTCA |
| *CALCOCO1* | si-*CALCOCO1*-1 | GTGAGAAAGTGCTGACGAA |
| si-*CALCOCO1*-2 | GCACCATAGCCGAACTACA |
